# Supplementary material for: Transcriptional dynamics of the developing sweet cherry (Prunus avium L.) fruit: sequencing, annotation and expression profiling of exocarp-associated genes
Source: PubMed Central journal article supplement — Hortic Res. 2014 Mar 12;1:11–. doi: 10.1038/hortres.2014.11 (PMC4591669; doi:10.1038/hortres.2014.11), 2014-03-12
Supplement: hortres201411-s9.pdf [file hortres201411-s9.pdf]

# FastQC Report

## Summary

Mi 16 Nov 2011  
all24samples.fastq

- ✓ [Basic Statistics](#)
- ✗ [Per base sequence quality](#)
- ✓ [Per sequence quality scores](#)
- ! [Per base sequence content](#)
- ✗ [Per base GC content](#)
- ✓ [Per sequence GC content](#)
- ✓ [Per base N content](#)
- ✓ [Sequence Length Distribution](#)
- ✗ [Sequence Duplication Levels](#)
- ! [Overrepresented sequences](#)
- ✗ [Kmer Content](#)

### ✓ Basic Statistics

| Measure            | Value                   |
|--------------------|-------------------------|
| Filename           | all24samples.fastq      |
| File type          | Conventional base calls |
| Encoding           | Illumina 1.5            |
| Total Sequences    | 665404362               |
| Filtered Sequences | 0                       |
| Sequence length    | 100                     |
| %GC                | 48                      |

### ✗ Per base sequence quality

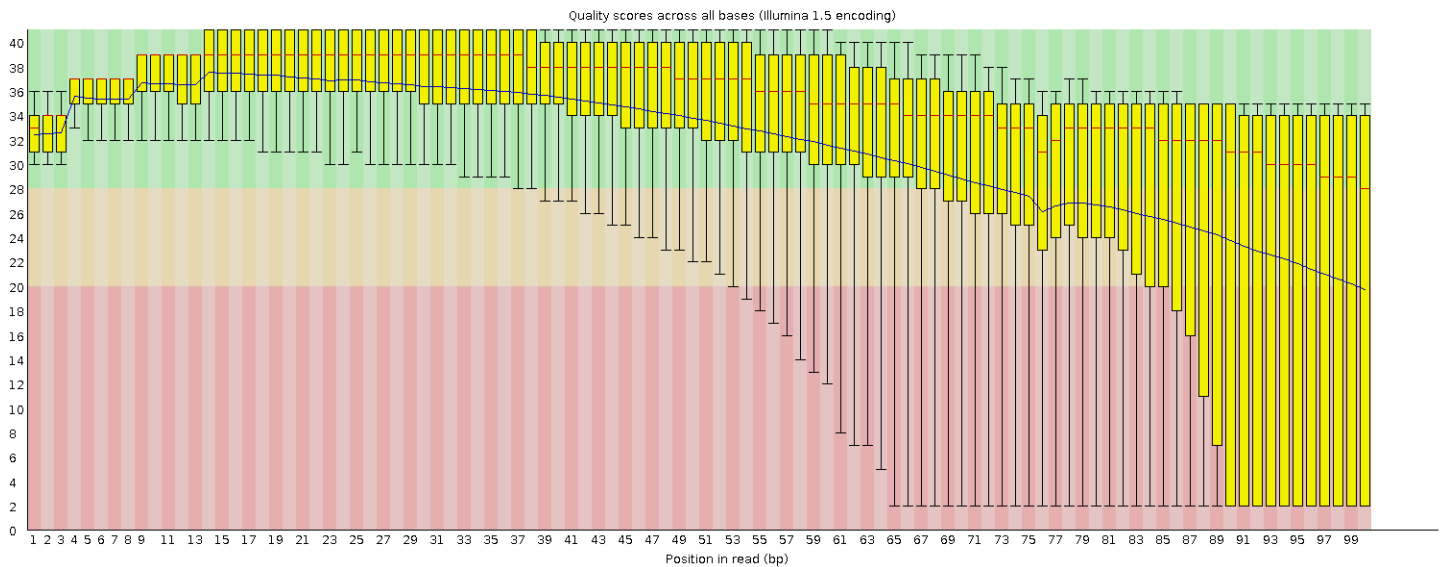

## ✔ Per sequence quality scores

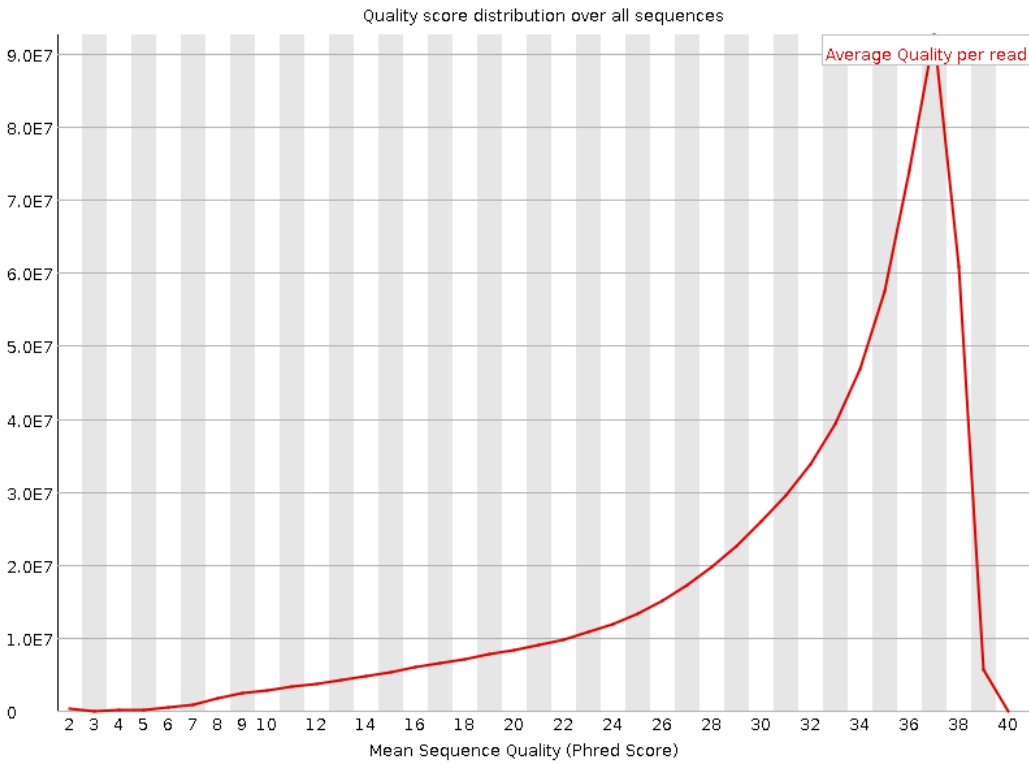

## ⚠ Per base sequence content

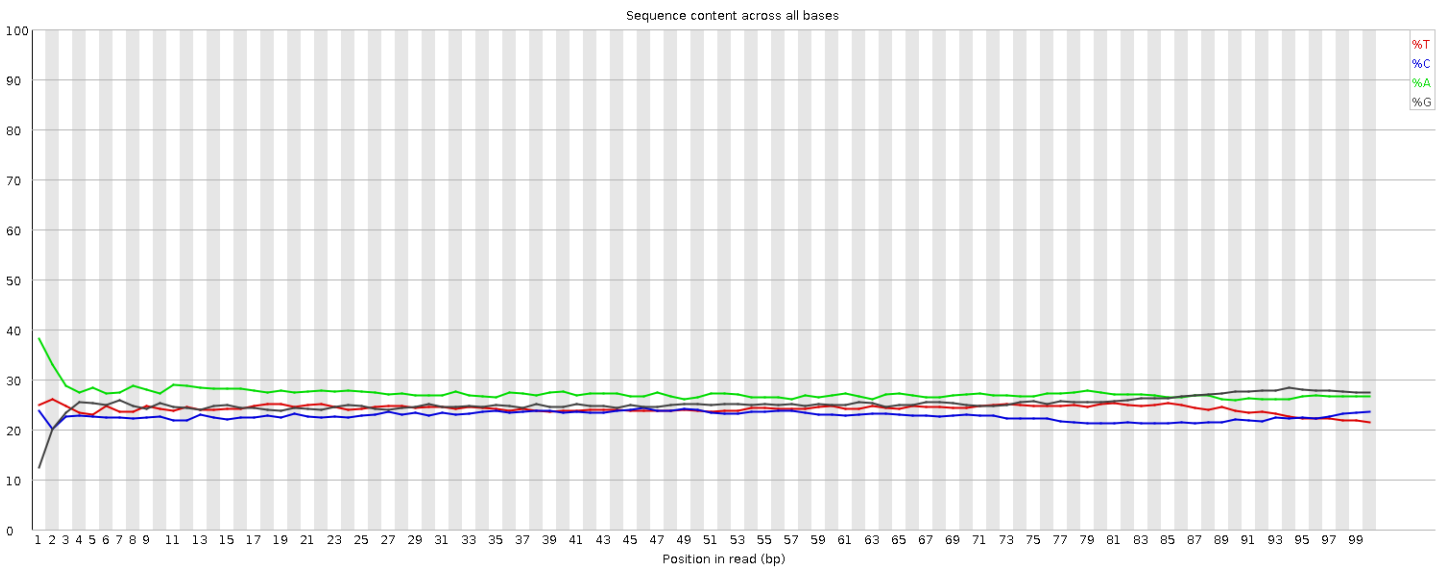

## ✘ Per base GC content

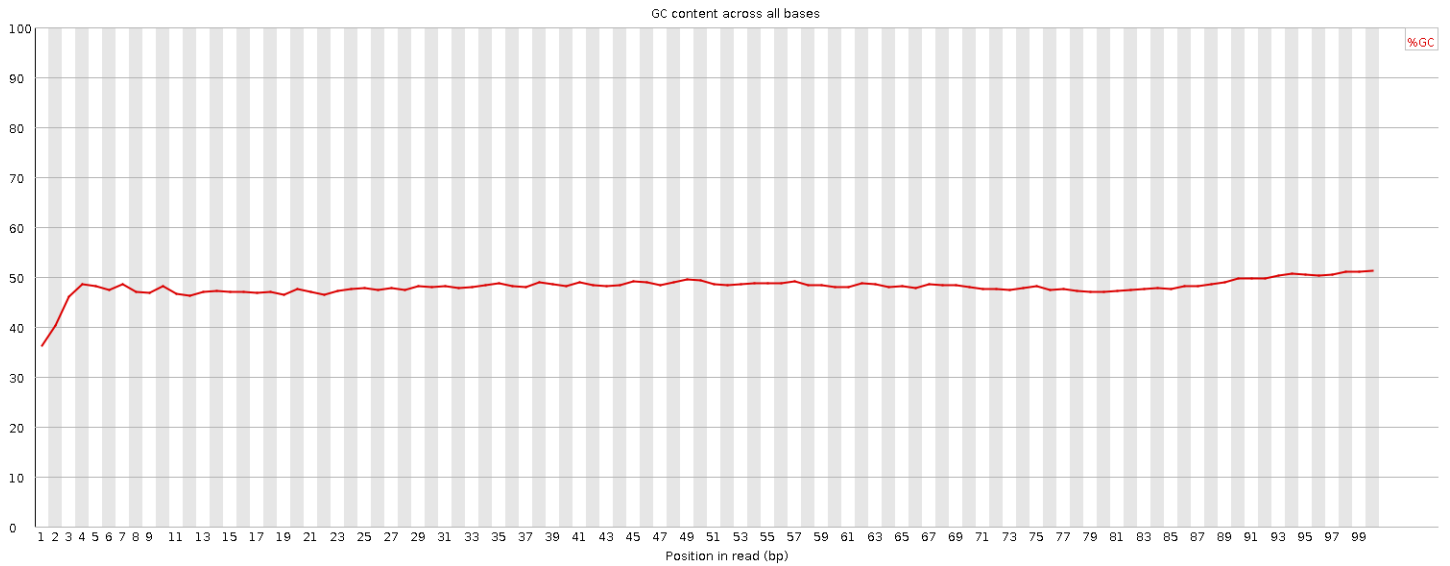

✔ **Per sequence GC content**

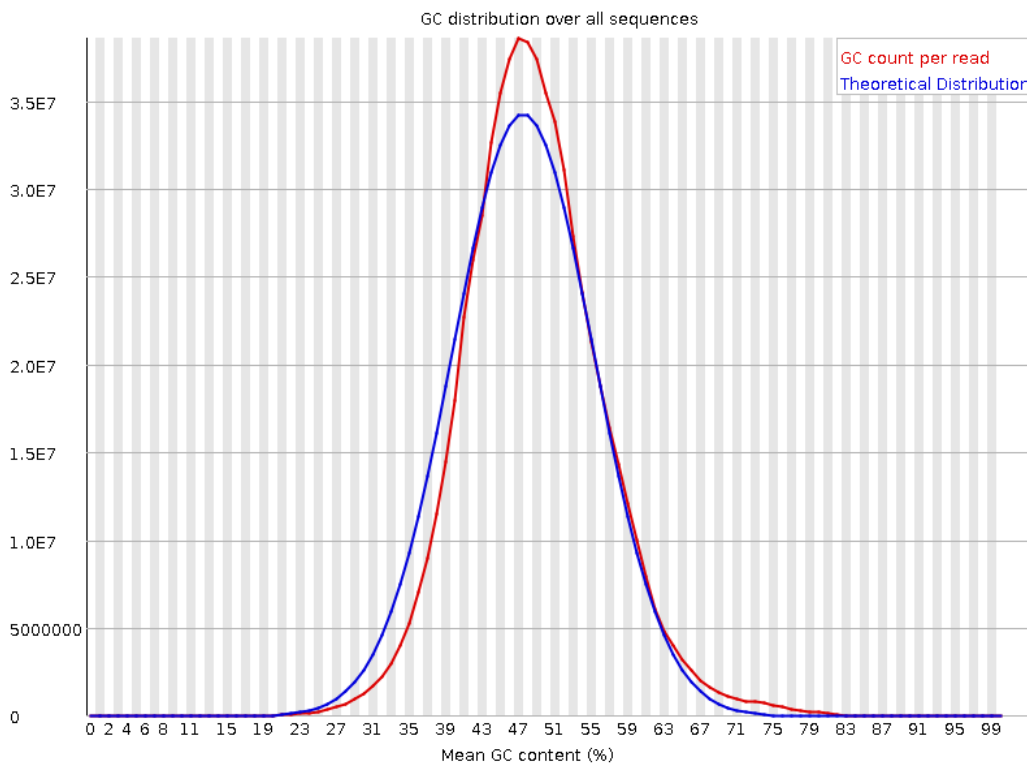

✔ **Per base N content**

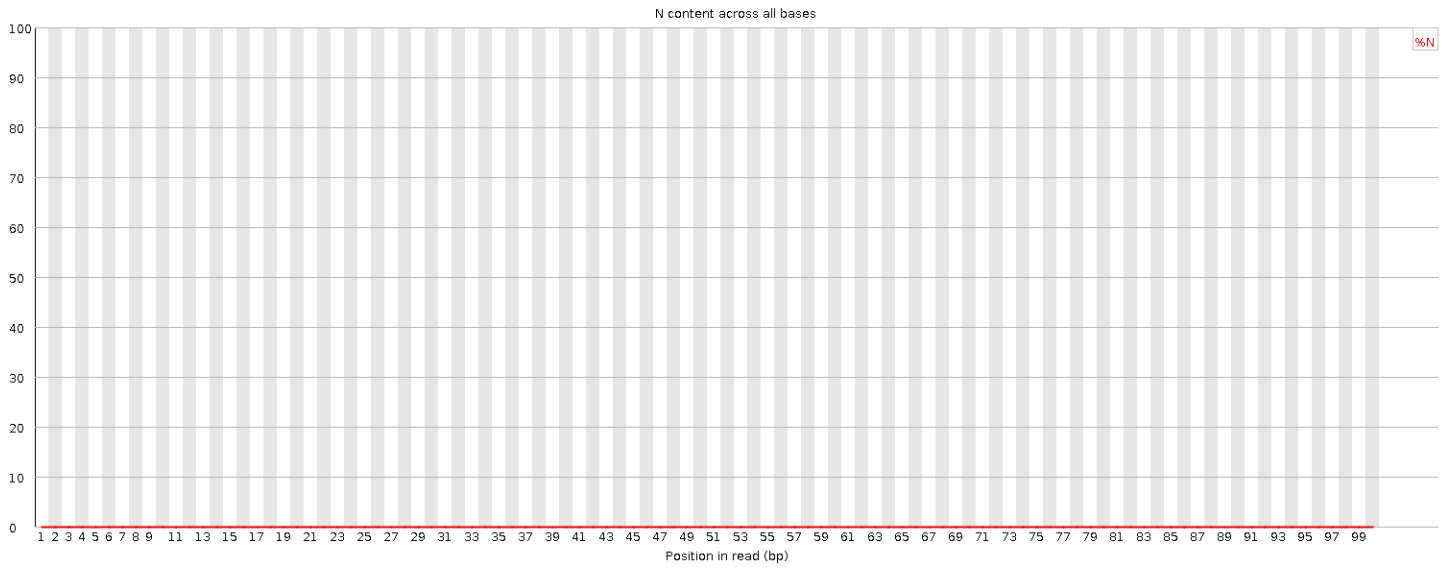

## ✔ Sequence Length Distribution

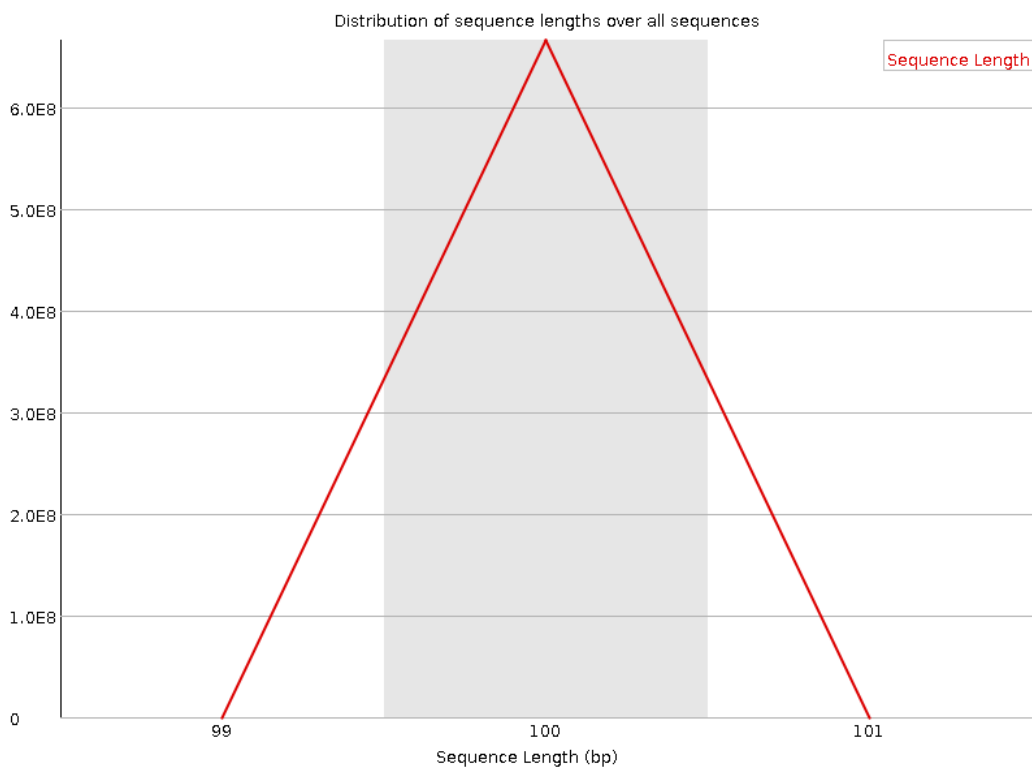

## ✘ Sequence Duplication Levels

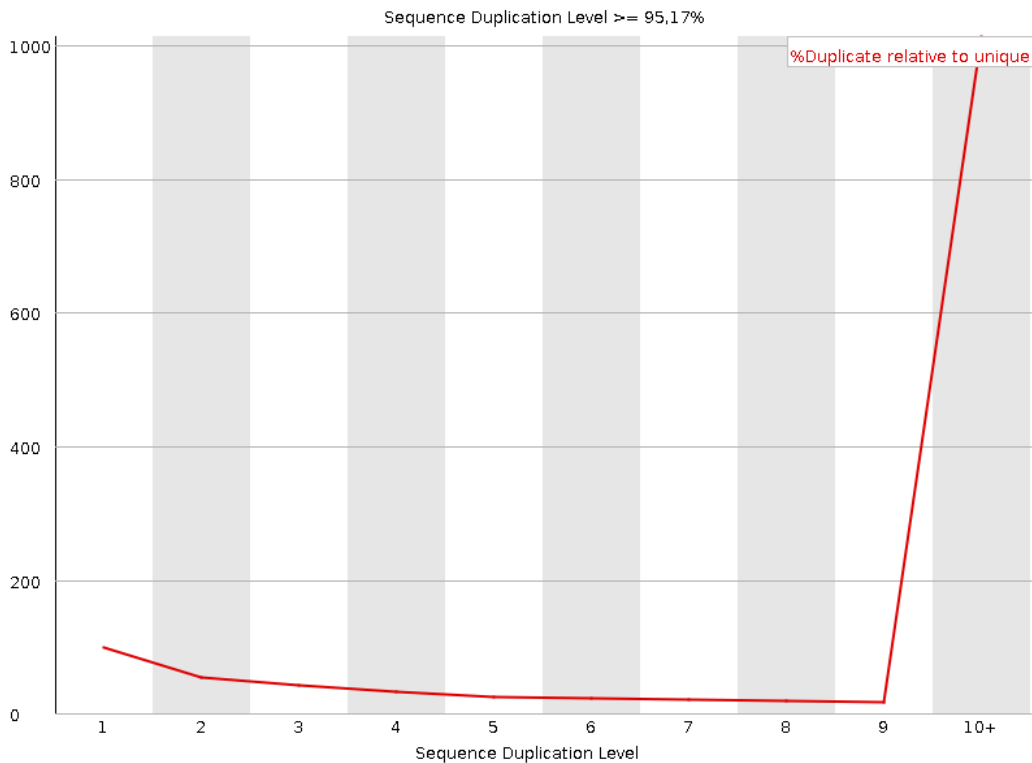

## ⚠ Overrepresented sequences

| Sequence                                                                                            | Count   | Percentage          | Possible Source |
|-----------------------------------------------------------------------------------------------------|---------|---------------------|-----------------|
| AAC TTTC AAC AAC G G G AT C T C T T G G C T C T G C A T C G A T G A A G A A C G C A G C G           | 2931282 | 0.44052641782952423 | No Hit          |
| T C A A A C G A G G A A A G G C T T A C G G T G G A T A C T A G G C A C C C A G A G A C G A G G A   | 1133722 | 0.17038090892466978 | No Hit          |
| A A A T G A G A A C T T T G A A G G C C G A A G A G G G A A A G G T T C C A T G T G A A C G G C A   | 964760  | 0.14498852954618896 | No Hit          |
| A A A C T T T C A A C A A C G G A T C T C T T G G C T C T G G C A T C G A T G A A G A A C G C A G C | 826171  | 0.12416074302801158 | No Hit          |
| T A C C T G G T T G A T C C T G C C A G T A G T C A T A T G C T T G T C T C A A G A T T A A G C C   | 752912  | 0.11315104664132032 | No Hit          |
| A A T G A G A A C T T T G A A G G C C G A A G A G G G A A A G G T T C C A T G T G A A C G G C A C   | 701056  | 0.10535789063552908 | No Hit          |

## ❌ Kmer Content

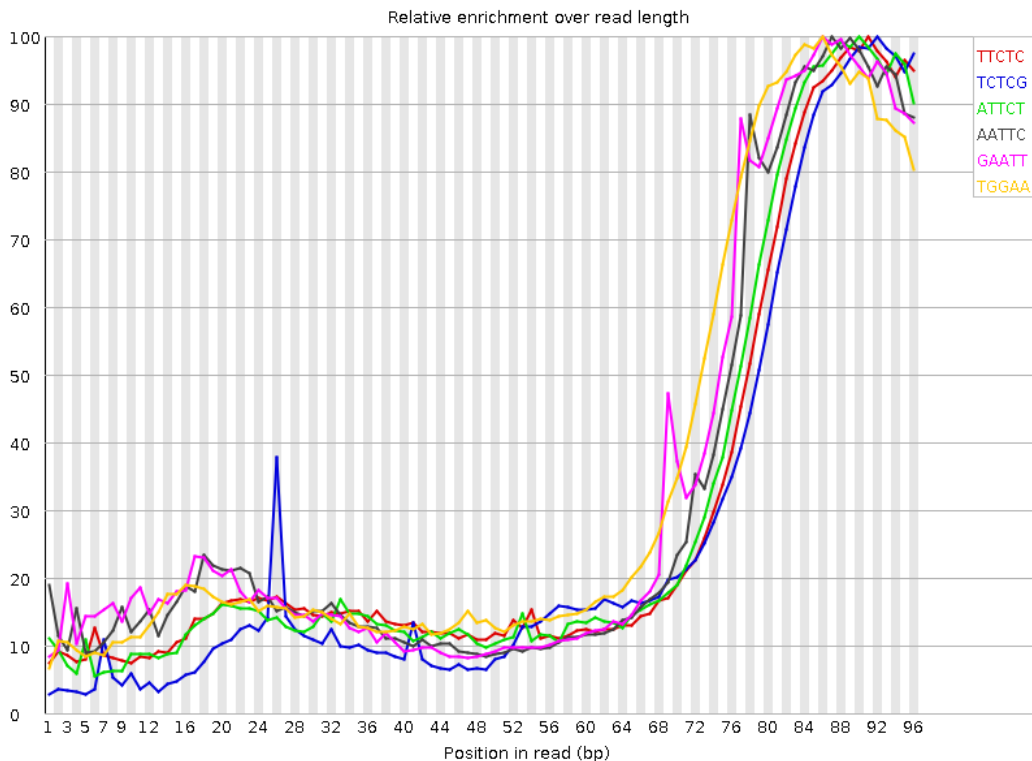

| Sequence | Count     | Obs/Exp Overall | Obs/Exp Max | Max Obs/Exp Position |
|----------|-----------|-----------------|-------------|----------------------|
| TTCTC    | 351261530 | 7.2508225       | 25.062649   | 91                   |
| TCTCG    | 322335055 | 6.406679        | 24.114845   | 92                   |
| ATTCT    | 354618905 | 6.1133475       | 20.826416   | 90                   |
| AATTC    | 374753770 | 5.7328615       | 18.27959    | 87                   |
| GAATT    | 403872680 | 5.598748        | 17.141178   | 86                   |
| TGGAA    | 413903215 | 5.524767        | 16.449793   | 86                   |
| AAAAA    | 545747925 | 5.4902825       | 15.713121   | 87                   |
| CTCGG    | 275186390 | 5.2664886       | 22.44595    | 93                   |
| GGAAT    | 377496150 | 5.0388074       | 16.504894   | 87                   |
| TCGGG    | 289375880 | 5.0185413       | 21.191135   | 94                   |
| CGGGT    | 221569025 | 3.842591        | 17.739004   | 95                   |
| GGGTG    | 235677880 | 3.7038627       | 16.555925   | 96                   |
| CTCTC    | 168547900 | 3.696816        | 11.397588   | 25                   |
| GGTGC    | 211211325 | 3.662961        | 17.37435    | 95                   |
| GTGCC    | 191337940 | 3.6618052       | 19.096737   | 96                   |
| CCAAG    | 232905025 | 3.6451957       | 16.377865   | 96                   |
| TCTCT    | 172215115 | 3.5549047       | 11.015066   | 17                   |
| TGCCA    | 199389795 | 3.5167105       | 16.885391   | 96                   |
| CAAGG    | 237811160 | 3.3728359       | 15.445037   | 96                   |
| GCCAA    | 214283595 | 3.353752        | 16.815811   | 96                   |
| CTCCA    | 166884465 | 3.2480943       | 10.588418   | 96                   |
| AAGGA    | 271084495 | 3.2109103       | 12.477973   | 96                   |
| ATGGA    | 239494000 | 3.1967583       | 7.8947678   | 82                   |
| TTGGA    | 183417280 | 2.7589712       | 5.7432365   | 90                   |
| GGGGG    | 180279480 | 2.7280424       | 7.660169    | 93                   |
| AGGAA    | 229120660 | 2.7138617       | 12.068609   | 96                   |
| GAACT    | 173290590 | 2.5525205       | 11.592409   | 96                   |
| AACTC    | 155611665 | 2.5293877       | 11.628915   | 96                   |
| ACTCC    | 125366050 | 2.440016        | 12.377329   | 96                   |

|       |           |            |           |    |
|-------|-----------|------------|-----------|----|
| AATGG | 175364590 | 2.3407612  | 5.387302  | 80 |
| AAGAA | 208191555 | 2.2726164  | 5.7763476 | 39 |
| GAAGA | 191120110 | 2.2637575  | 6.1038404 | 38 |
| CTGGA | 135959835 | 2.173028   | 5.041362  | 85 |
| GGAAC | 152313310 | 2.160234   | 12.197434 | 96 |
| CTTGG | 115772035 | 2.0852113  | 7.796597  | 20 |
| TCCAG | 114658975 | 2.0222824  | 8.236729  | 96 |
| CCAGT | 113762325 | 2.0064676  | 6.810659  | 96 |
| CTCTT | 96054025  | 1.9827697  | 9.15352   | 18 |
| ATCTC | 103704990 | 1.8996109  | 7.2383847 | 16 |
| GCTCT | 94942255  | 1.8870567  | 8.499897  | 24 |
| CGGGG | 105781265 | 1.7664143  | 5.0042777 | 96 |
| TGAAG | 131718565 | 1.7581751  | 5.9242873 | 37 |
| GATGA | 131411370 | 1.7540748  | 9.180946  | 7  |
| GTGAA | 128926735 | 1.72091    | 5.3542094 | 67 |
| TGATG | 113294280 | 1.7041779  | 8.996679  | 6  |
| TCTTG | 86576855  | 1.6194946  | 7.707107  | 19 |
| CAGTC | 91811240  | 1.6193086  | 5.8065314 | 96 |
| TCATC | 87671290  | 1.6059144  | 5.7736454 | 89 |
| CTTTC | 76257905  | 1.5741335  | 8.178734  | 3  |
| AACAA | 126951180 | 1.5292512  | 5.344737  | 8  |
| ATCTT | 83834245  | 1.4452356  | 5.2623954 | 96 |
| TTGCA | 86985160  | 1.4438801  | 5.845577  | 72 |
| AATCT | 93939225  | 1.437052   | 5.127082  | 95 |
| TGAAT | 103338235 | 1.4325426  | 5.328317  | 68 |
| TTCAA | 91802250  | 1.4043611  | 6.5241313 | 5  |
| TGGCT | 77727705  | 1.3999814  | 7.0502176 | 22 |
| ACTTT | 81197155  | 1.3997744  | 7.0007863 | 2  |
| AGAAC | 103732335 | 1.3558657  | 5.49907   | 40 |
| GGCTC | 70838300  | 1.3556958  | 7.388351  | 23 |
| AATTG | 96646160  | 1.3397723  | 5.1410775 | 70 |
| AACTT | 87439110  | 1.3376154  | 7.0128527 | 1  |
| TTGGC | 73736025  | 1.3280858  | 6.9223084 | 21 |
| ATGAA | 105741365 | 1.3007673  | 5.0034146 | 36 |
| TTTCA | 75341520  | 1.2988278  | 6.666243  | 4  |
| ATGAT | 93003080  | 1.2892698  | 6.803133  | 5  |
| ATTGC | 73136485  | 1.2140037  | 5.7033467 | 71 |
| TGCAG | 75307480  | 1.2036294  | 5.5308366 | 73 |
| TGTGA | 79990590  | 1.2032222  | 5.4261622 | 66 |
| TCAAC | 72491670  | 1.1783149  | 6.3813815 | 6  |
| CAACA | 81236995  | 1.1717513  | 5.7618093 | 7  |
| GCAGA | 81645745  | 1.1579679  | 5.005228  | 74 |
| GATCT | 69674745  | 1.1565417  | 6.69485   | 15 |
| CATCG | 63306875  | 1.1165665  | 6.9758463 | 31 |
| TTCAG | 65679680  | 1.090227   | 5.120119  | 80 |
| GGATC | 67663790  | 1.0814613  | 6.332414  | 14 |
| GCAGC | 62933685  | 1.0687734  | 6.2510095 | 45 |
| ACAAC | 71793890  | 1.0355452  | 5.7326546 | 9  |
| ATGTG | 67840375  | 1.0204581  | 5.2765813 | 65 |
| GCGAA | 71281660  | 1.0109758  | 5.33872   | 48 |
| GAACG | 70481765  | 0.9996311  | 6.406803  | 41 |
| GCATC | 54385745  | 0.95922136 | 6.2774577 | 30 |
| CGATG | 58663020  | 0.93760335 | 5.889255  | 34 |

|       |          |            |           |    |
|-------|----------|------------|-----------|----|
| ATCGA | 63241530 | 0.93152946 | 5.6932573 | 32 |
| TCGAT | 52138115 | 0.8654486  | 5.9729943 | 33 |
| CTCGC | 40530720 | 0.85596794 | 8.093585  | 27 |
| CGGAT | 53547695 | 0.8558458  | 6.181319  | 13 |
| AACGC | 52337820 | 0.81913906 | 5.915318  | 42 |
| ACGCA | 50323695 | 0.787616   | 5.915792  | 43 |
| AATGC | 50673610 | 0.7464076  | 5.20058   | 52 |
| CAGCG | 42363370 | 0.71943736 | 5.7426176 | 46 |
| AACGG | 48017690 | 0.6810269  | 5.014657  | 11 |
| GCGAT | 42479200 | 0.67893946 | 5.4512043 | 55 |
| CAACG | 42478350 | 0.66482854 | 5.672545  | 10 |
| TGCGA | 37398305 | 0.5977321  | 5.250594  | 54 |
| ACGGA | 41761760 | 0.59230006 | 5.0673695 | 12 |
| CGCAT | 32615490 | 0.57525134 | 6.1021786 | 29 |
| TCGCA | 31274635 | 0.5516022  | 5.9506807 | 28 |
| CGCAG | 29175130 | 0.49546757 | 5.6804123 | 44 |
| ATGCG | 30950195 | 0.49467283 | 5.3406377 | 53 |

Produced by [FastQC](#) (version 0.10.1)



# FastQC Report

## Summary

Mi 16 Nov 2011  
all24-adapter-qual.fastq

- ✔ [Basic Statistics](#)
- ✔ [Per base sequence quality](#)
- ✔ [Per sequence quality scores](#)
- ⚠ [Per base sequence content](#)
- ✖ [Per base GC content](#)
- ✔ [Per sequence GC content](#)
- ✔ [Per base N content](#)
- ⚠ [Sequence Length Distribution](#)
- ✖ [Sequence Duplication Levels](#)
- ⚠ [Overrepresented sequences](#)
- ✖ [Kmer Content](#)

### ✔ Basic Statistics

| Measure            | Value                    |
|--------------------|--------------------------|
| Filename           | all24-adapter-qual.fastq |
| File type          | Conventional base calls  |
| Encoding           | Illumina 1.5             |
| Total Sequences    | 653844992                |
| Filtered Sequences | 0                        |
| Sequence length    | 1-100                    |
| %GC                | 47                       |

### ✔ Per base sequence quality

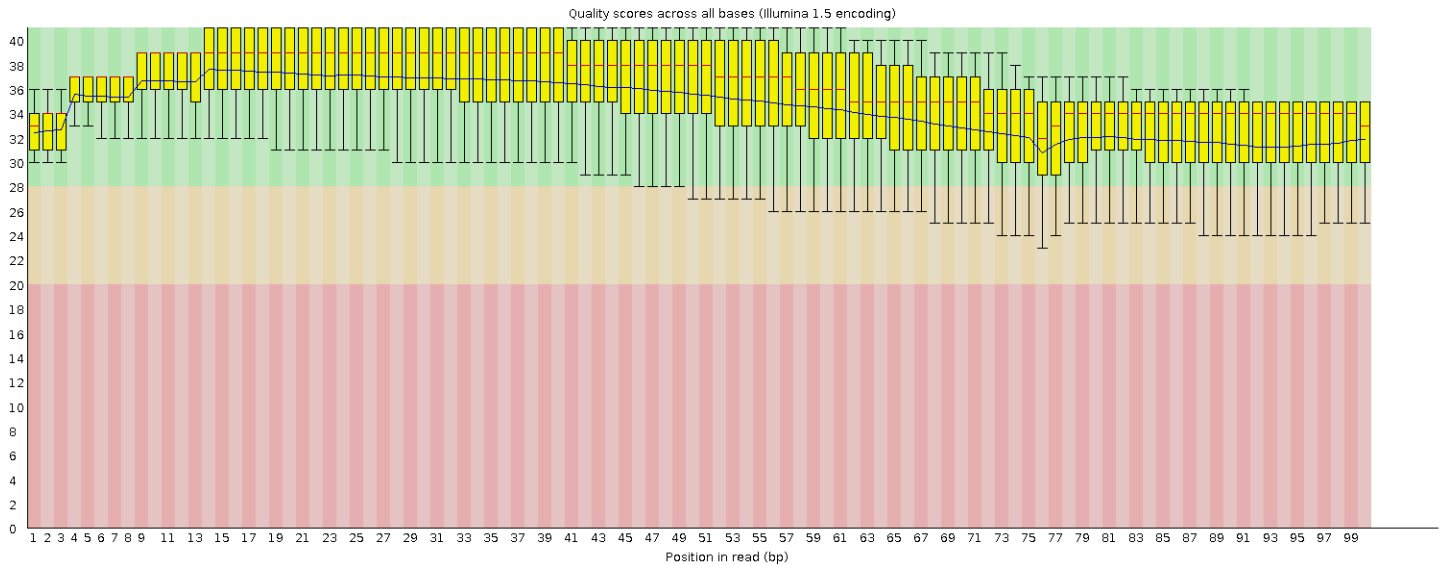

## ✔ Per sequence quality scores

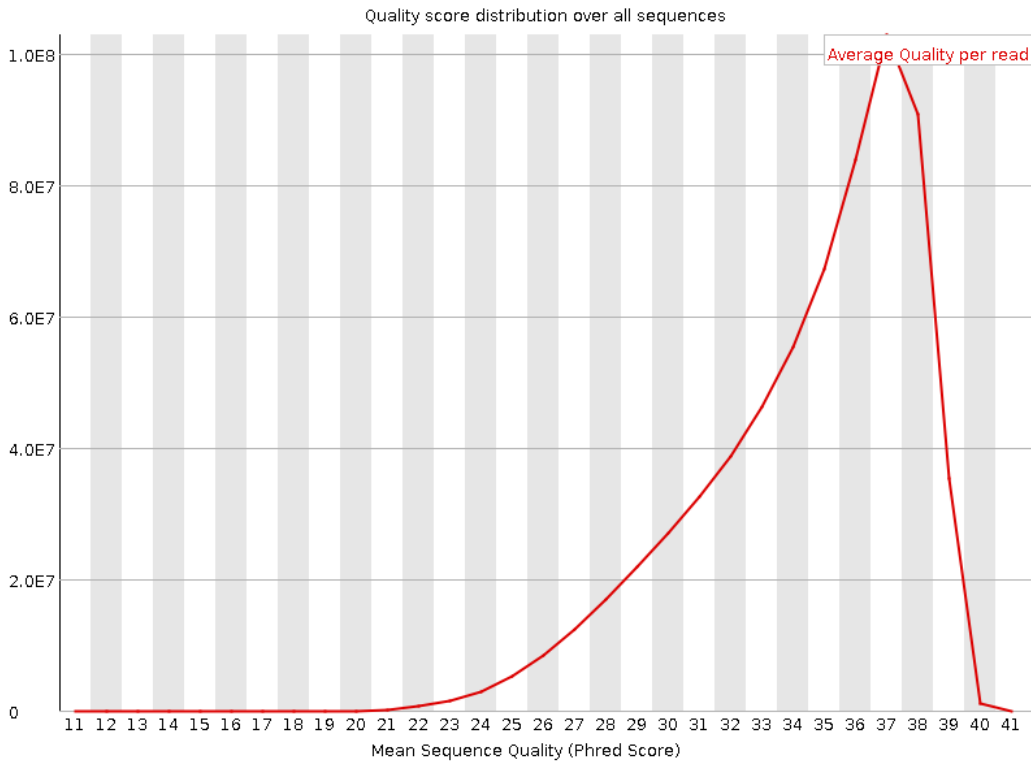

## ⚠ Per base sequence content

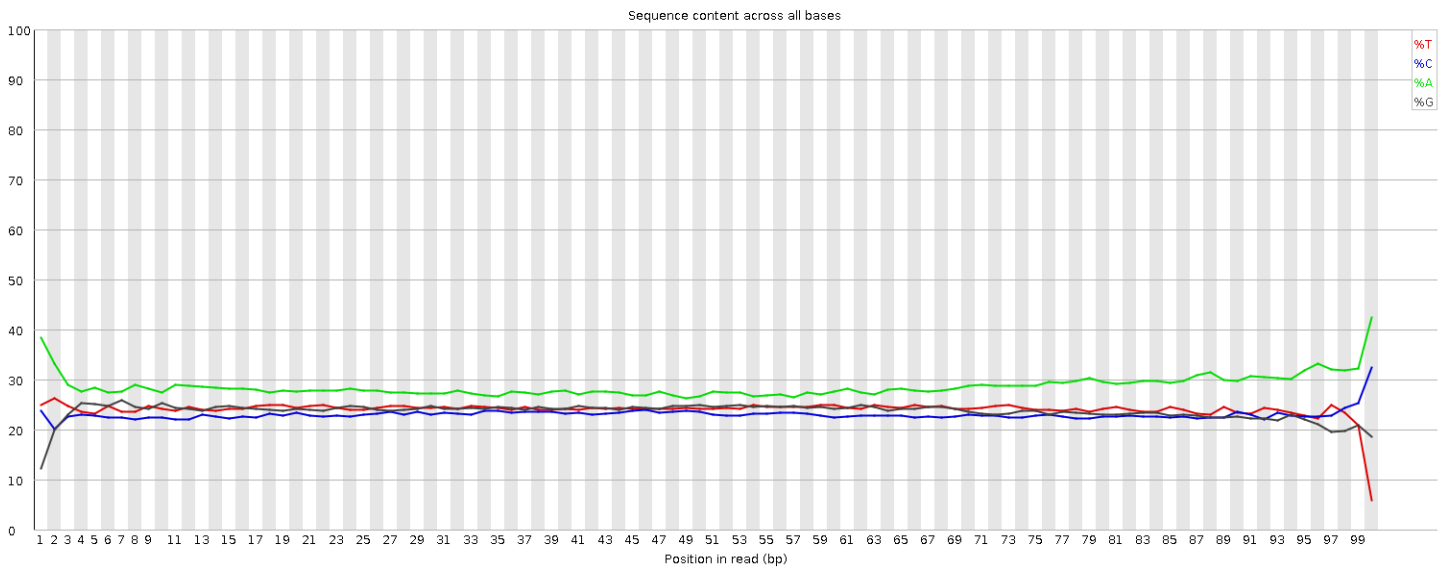

## ✘ Per base GC content

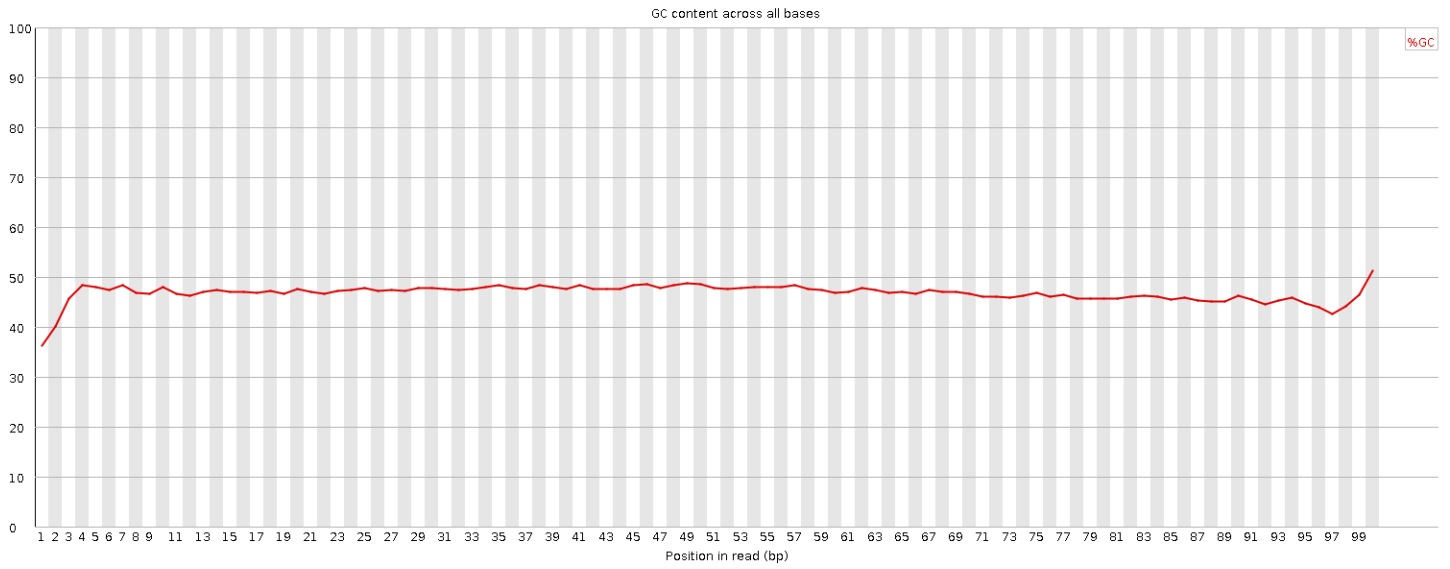

✔ **Per sequence GC content**

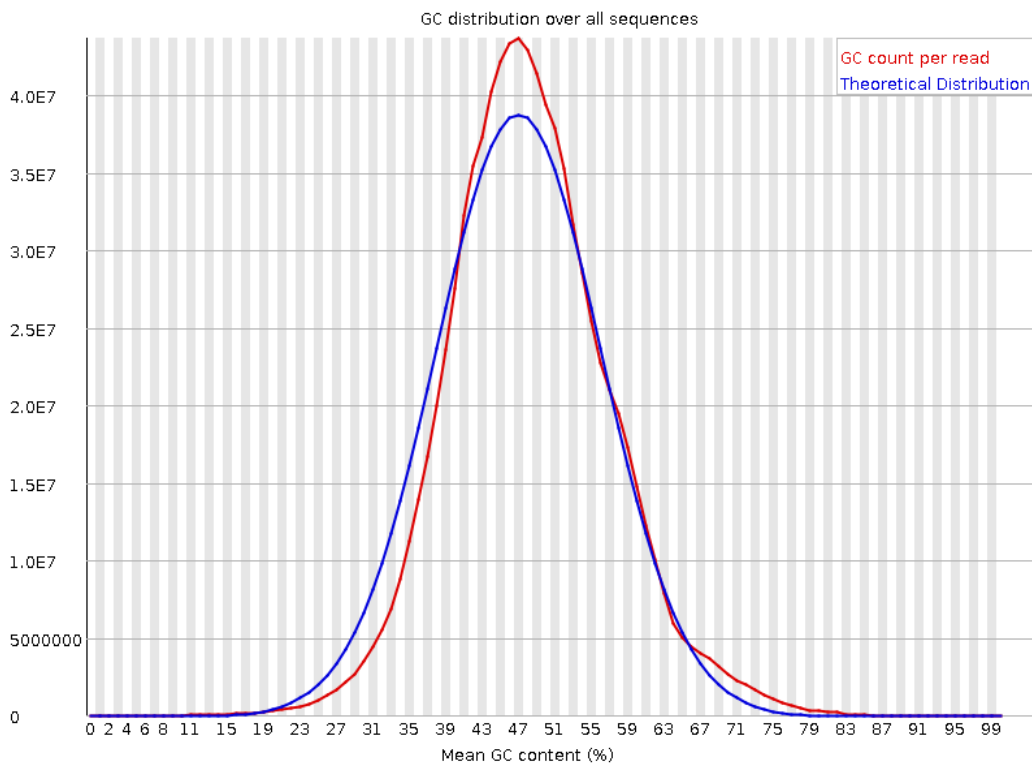

✔ **Per base N content**

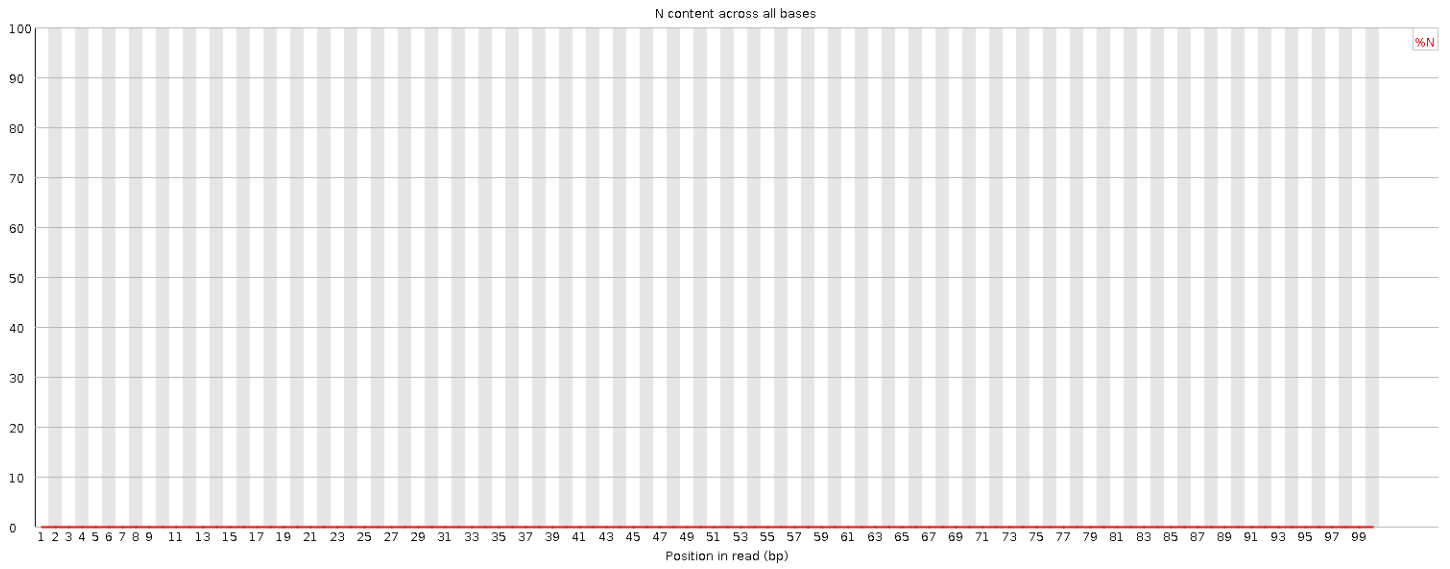

## Sequence Length Distribution

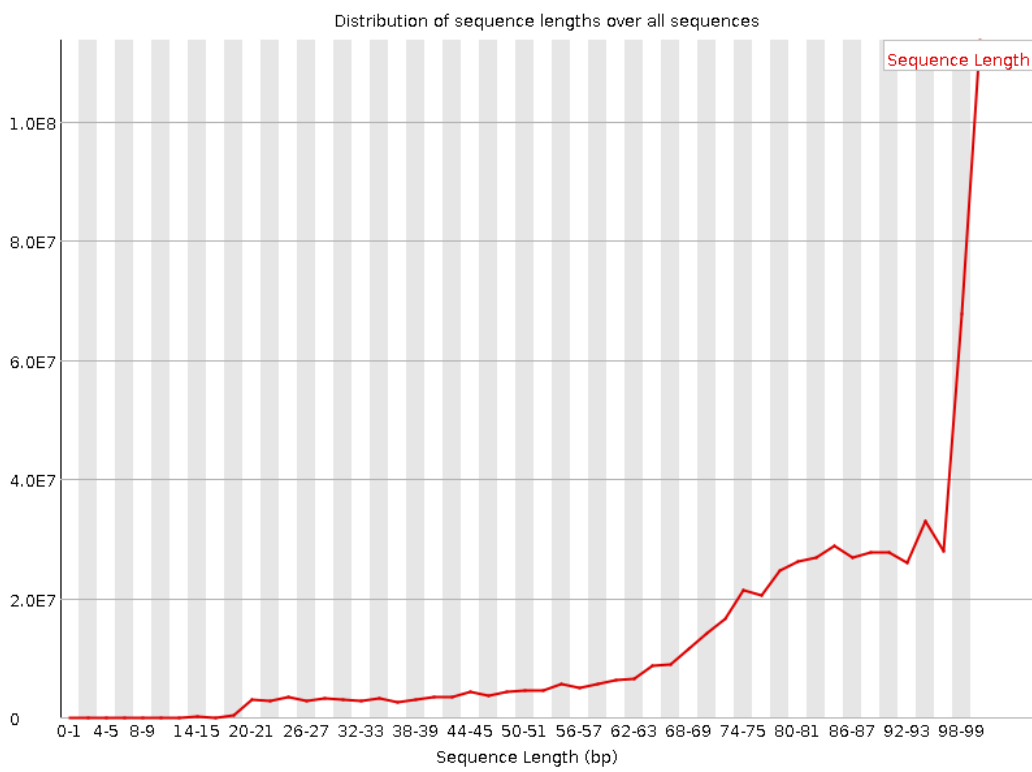

## Sequence Duplication Levels

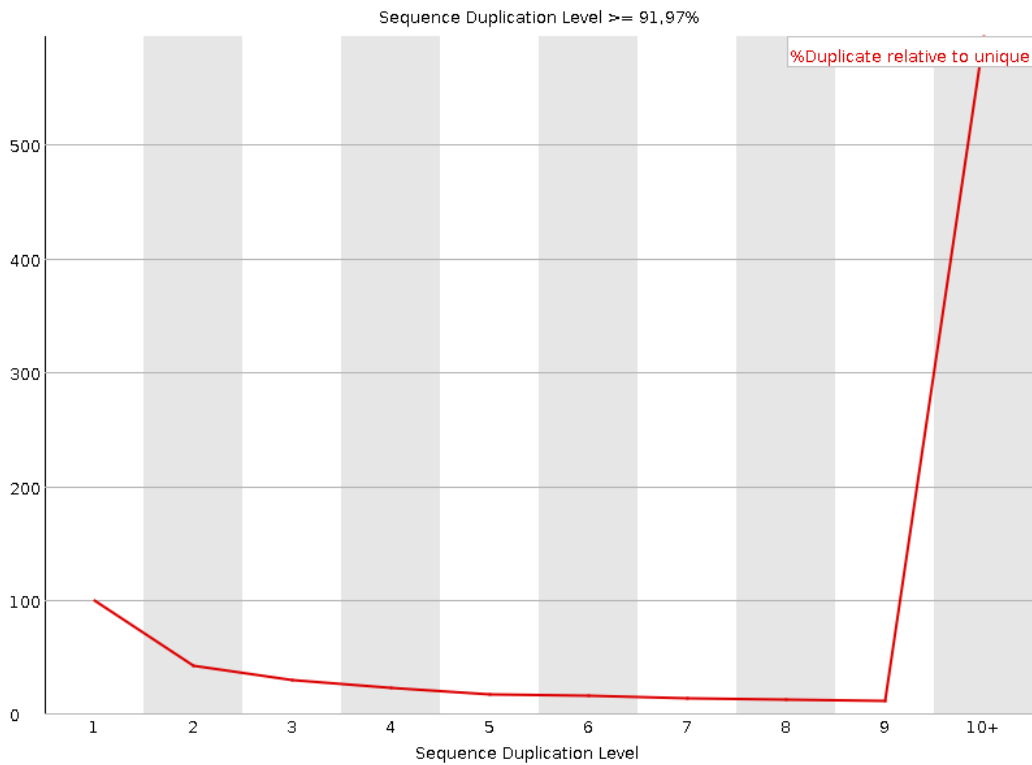

### ⚠ Overrepresented sequences

| Sequence                                           | Count   | Percentage          | Possible Source |
|----------------------------------------------------|---------|---------------------|-----------------|
| AACTTTCAACAACGGATCTCTGGCTCTCGCATCGATGAAGAACGCAGCG  | 2814339 | 0.4304290824942191  | No Hit          |
| AAATGAGAACTTTGAAGGCCGAAGAGGGGAAAGGTTCCATGTGAACGGCA | 801773  | 0.1226243237785631  | No Hit          |
| AACTTTCAACAACGGATCTCTGGCTCTGGCATCGATGAAGAACGCAGC   | 772010  | 0.11807232745463929 | No Hit          |
| TACCTGGTTGATCCTGCCAGTAGTCATATGCTTGCTCAAAGATTAAGCC  | 739084  | 0.11303657732993694 | No Hit          |
| TCAAACGAGGAAAGGCTTACGGTGGATACCTAGGCACCCAGAGACGAGGA | 718430  | 0.10987772465801804 | No Hit          |

### ⊗ Kmer Content

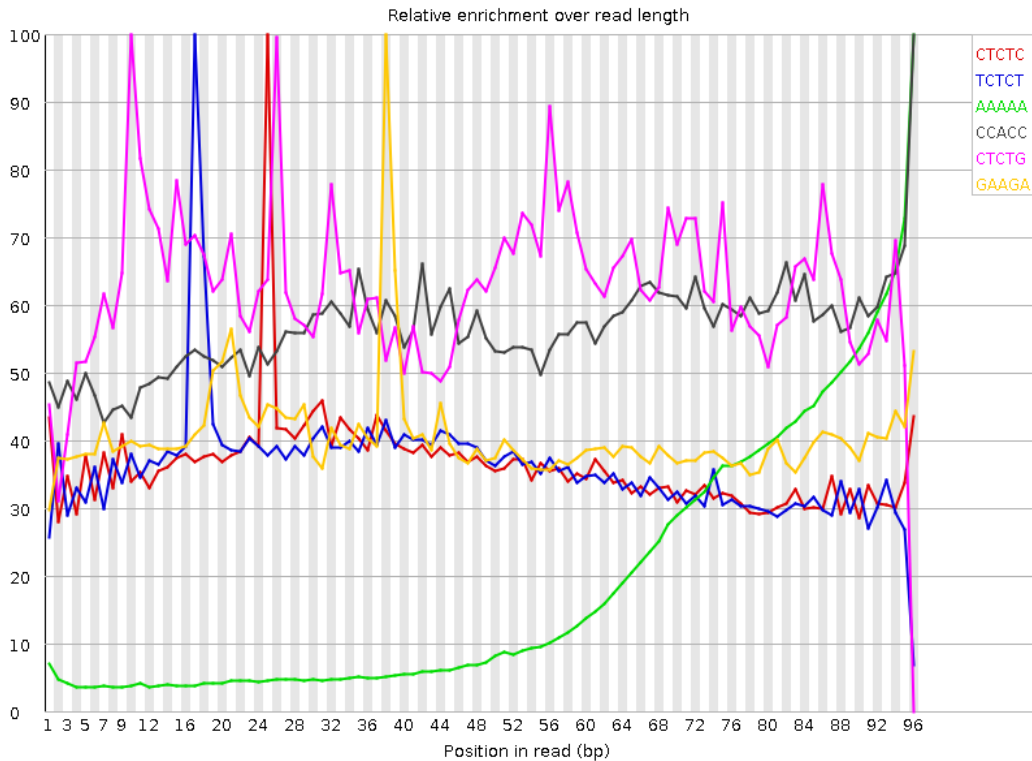

| Sequence | Count     | Obs/Exp Overall | Obs/Exp Max | Max Obs/Exp Position |
|----------|-----------|-----------------|-------------|----------------------|
| CTCTC    | 161469585 | 4.2909737       | 11.538213   | 25                   |
| TCTCT    | 163199420 | 4.0999393       | 10.984784   | 17                   |
| AAAAA    | 351107560 | 3.677394        | 26.924915   | 96                   |
| CCACC    | 131336325 | 3.1697645       | 5.705923    | 96                   |
| CTCTG    | 118686375 | 3.0308845       | 4.782057    | 10                   |
| GAAGA    | 180153640 | 2.6449711       | 6.4678245   | 38                   |
| AAGAA    | 194265050 | 2.4089823       | 5.6348166   | 39                   |
| GCTCT    | 87593950  | 2.2368796       | 9.0954895   | 24                   |
| CTCTT    | 87495350  | 2.1980815       | 9.0908      | 18                   |
| GATGA    | 125108815 | 2.1394153       | 9.589545    | 7                    |
| TGAAG    | 125087485 | 2.13905         | 6.509571    | 37                   |
| GTGAA    | 122665290 | 2.0976298       | 9.023504    | 84                   |
| TGATG    | 101201105 | 2.01568         | 9.699804    | 6                    |
| CTTGG    | 75924870  | 1.8631849       | 8.425186    | 20                   |
| CTTTC    | 71534735  | 1.7971146       | 8.115739    | 3                    |
| TCATC    | 81839010  | 1.7651837       | 13.362174   | 89                   |
| TCTTG    | 71281635  | 1.7208375       | 8.071495    | 19                   |
| TTGCA    | 82263990  | 1.7050719       | 7.8412743   | 72                   |
| TGGCT    | 69470765  | 1.704802        | 7.9321265   | 22                   |
| TTGGC    | 67443760  | 1.6550597       | 7.795545    | 21                   |
| GAATT    | 98348085  | 1.6544867       | 7.0921283   | 77                   |
| GGCTC    | 63171395  | 1.6398294       | 8.324819    | 23                   |
| AATTC    | 90658980  | 1.587102        | 7.435363    | 78                   |
| GAATC    | 88444585  | 1.573892        | 14.26407    | 94                   |
| CCATC    | 67805560  | 1.5470387       | 5.0660157   | 90                   |
| TTCAA    | 88084365  | 1.54203         | 6.0829296   | 5                    |
| ACTTT    | 75390220  | 1.5372279       | 6.7587547   | 2                    |
| TGTGA    | 76623065  | 1.5261453       | 7.0244393   | 66                   |
| TGAAT    | 89920700  | 1.5127147       | 9.149461    | 85                   |

|       |           |            |           |    |
|-------|-----------|------------|-----------|----|
| TGCAG | 70165395  | 1.4783105  | 7.965675  | 73 |
| AGAAC | 96534290  | 1.474878   | 5.5535307 | 40 |
| ATGAT | 87478965  | 1.4716378  | 6.7150583 | 5  |
| ATTGC | 70291075  | 1.4569113  | 7.5279655 | 71 |
| TTTCA | 71189880  | 1.4515817  | 6.431454  | 4  |
| ATGAA | 100151040 | 1.4465171  | 5.035462  | 36 |
| CAGAA | 94522245  | 1.4441371  | 6.570195  | 75 |
| AATTG | 85038260  | 1.430579   | 6.234178  | 70 |
| ATCTC | 65708380  | 1.4172626  | 6.9733787 | 16 |
| AACTT | 80297405  | 1.4057093  | 6.539655  | 1  |
| ATTCA | 80201710  | 1.404034   | 7.4075108 | 79 |
| GCAGA | 74548820  | 1.3485103  | 7.0777817 | 74 |
| CATCG | 60608170  | 1.3288331  | 13.516795 | 90 |
| AATCT | 74938980  | 1.3119032  | 15.804409 | 95 |
| GGATC | 61399395  | 1.2936201  | 6.814786  | 14 |
| AGAAT | 89247575  | 1.2890347  | 5.9541993 | 76 |
| TTCAG | 62174660  | 1.2886838  | 8.638154  | 80 |
| GAAAT | 89018170  | 1.2857213  | 5.127297  | 50 |
| TCAAC | 69412180  | 1.2853932  | 5.9283876 | 6  |
| AAATG | 87305835  | 1.2609895  | 5.03232   | 51 |
| GCAGC | 56004260  | 1.2481594  | 7.126203  | 45 |
| ATGTG | 61905910  | 1.2330154  | 6.7290273 | 65 |
| CAACA | 76590115  | 1.2177098  | 5.1819897 | 7  |
| ATCAT | 69343625  | 1.2139493  | 10.247241 | 88 |
| CGAAA | 77748805  | 1.187868   | 5.0531144 | 49 |
| GAACG | 64870215  | 1.1734344  | 7.0491138 | 41 |
| GATCT | 55803070  | 1.1566209  | 6.8151765 | 15 |
| AGTGA | 67455875  | 1.1535248  | 8.031737  | 83 |
| GCGAA | 63647005  | 1.1513076  | 5.83548   | 48 |
| TCGAA | 61216505  | 1.089362   | 13.092655 | 92 |
| GCATC | 49347445  | 1.0819418  | 6.6011033 | 30 |
| ATCGA | 59824015  | 1.0645823  | 11.492909 | 91 |
| ACAAC | 66549765  | 1.0580778  | 5.1585293 | 9  |
| CAGTG | 49940270  | 1.0521884  | 9.408738  | 82 |
| AATCA | 69718865  | 1.0478885  | 8.446142  | 87 |
| CGATG | 48529395  | 1.0224628  | 6.550388  | 34 |
| TCGAT | 48539485  | 1.0060698  | 6.335941  | 33 |
| AATGT | 58869180  | 0.9903424  | 5.7667623 | 64 |
| CTCGC | 36463455  | 0.9849919  | 8.660985  | 27 |
| TCTCG | 38561455  | 0.9847408  | 7.57115   | 26 |
| CGGAT | 46226440  | 0.97394204 | 6.624664  | 13 |
| TCAGT | 45960220  | 0.9526098  | 8.638237  | 81 |
| AACGC | 48878380  | 0.9200827  | 6.1668425 | 42 |
| ACGCA | 47854080  | 0.90080124 | 6.194221  | 43 |
| AGCGA | 49534040  | 0.896019   | 5.4355483 | 47 |
| CAGCG | 38362735  | 0.85498506 | 6.5925684 | 46 |
| AATGC | 47580575  | 0.84670746 | 5.6402125 | 52 |
| CGAAT | 45985855  | 0.8183291  | 12.690145 | 93 |
| GCGAT | 36853575  | 0.7764657  | 6.433112  | 55 |
| AACGG | 41571090  | 0.75197756 | 5.2150106 | 11 |
| TGCCA | 35262645  | 0.7429465  | 6.2744617 | 54 |
| TAATG | 43950310  | 0.73936576 | 5.4525576 | 63 |
| CAACG | 38943275  | 0.73306507 | 5.5669236 | 10 |

|       |          |            |           |    |
|-------|----------|------------|-----------|----|
| GTAAT | 42818510 | 0.72032565 | 5.387429  | 62 |
| ACGGA | 37135620 | 0.6717444  | 5.2731133 | 12 |
| CGCAT | 29769555 | 0.65269697 | 6.38768   | 29 |
| TCGCA | 29091420 | 0.6378289  | 6.232082  | 28 |
| ATGCG | 27999965 | 0.58992946 | 6.3275867 | 53 |
| CGCAG | 26051925 | 0.5806157  | 6.5056944 | 44 |
| CGATA | 29185755 | 0.51936734 | 5.368032  | 56 |
| TAAGT | 29210810 | 0.49140656 | 5.174328  | 59 |

Produced by [FastQC](#) (version 0.10.1)
