# Supplementary material for: Transcriptional dynamics of the developing sweet cherry (Prunus avium L.) fruit: sequencing, annotation and expression profiling of exocarp-associated genes
Source: PubMed Central journal article supplement — Hortic Res. 2014 Mar 12;1:11–. doi: 10.1038/hortres.2014.11 (PMC4591669; doi:10.1038/hortres.2014.11), 2014-03-12
Supplement: hortres201411-s13.pdf [file hortres201411-s13.pdf]

## Method S1 Bioinformatics

### 2011-2012 De novo Assembly Analysis Pipeline

|                        |                                                  |
|------------------------|--------------------------------------------------|
| Total RNA preparations | 24 samples                                       |
| Quality control        | Gel Electrophoresis and Agilent 2100 Bioanalyzer |
| GenXpro                | Sample processing, sequencing                    |
| Platform               | Illumina Hiseq 2000                              |

#### Hardware and operating systems:

|                        |                                                                                                                                                                    |
|------------------------|--------------------------------------------------------------------------------------------------------------------------------------------------------------------|
| Local hardware         | Dell Precision T1500 64bit<br>8 GB RAM, 4x Intel Core i5 CPU 3.2GHz                                                                                                |
| Local operating system | Scientific Linux Version 6.1 (Carbon)<br>Kernel Linux 2.6.32-220.7.1el6.x86_64<br>Bio-Linux6 (Ubuntu lucid 10.04)<br>Kernel Linux 2.6.32-40 generic                |
| RRZN hardware          | Cluster System of the Computation Centre Lower Saxony/Hannover (RRZN)<br>at the Leibniz University Hannover<br>Computing power up to 640 GB RAM, 160x CPU (2-3GHz) |
| RRZN operating system  | Various versions of Scientific Linux                                                                                                                               |

#### A Quality control of GenXpro fastq data files and first assessment

Program: FastQC 0.10.1

Simon Andrews

<http://www.bioinformatics.babraham.ac.uk/projects/fastqc/>

```
uwe@knut:~ fastqc $in --nogroup
```

\$in = variable for data file name

--nogroup = All reports will show data for every base in the read

Total 100bp single end, strand specific reads in 24 datafiles: 665404362

Data volume in 24 data files: 168 GB

Two-thirds of all 100 bp reads bearing 3`end adapter derived sequences

Read quality drops rapidly after base 50-100

#### B Adapter trimming (clipping off 3`end adapter sequences)

Program: ea-utils-1.0.5-171-x86\_64 fastq processing utilities

Erik Aronesty (2011). ea-utils: "Command-line tools for processing biological sequencing data"

<http://code.google.com/p/ea-utils/>

```
uwe@knut:~ fastq-mcf Adapter-Pix2.fa $in -l 20 -o $in-adapter.fastq -q 2
```

Adapter-Pix2.fa = adapters sequences in fasta format

\$in = Illumina Hiseq data files in fastq format

-l 20 = minimum length 20 bp after adapter clipping

-q 2 = in this case no quality clipping

-o = output

\$in-adapter.fastq = Data files in fastq format after adapter clipping

Total 20-100bp sequences in 24 data files: 654462398

#### C Quality trimming

Program: fastx-tools\_0.0.13\_binaries\_Linux\_2.6\_amd64

[http://hannonlab.cshl.edu/fastx\\_toolkit](http://hannonlab.cshl.edu/fastx_toolkit)

```
uwe@knut:~ fastq_quality_trimmer -i $in-adapter.fastq -o $in-adapter-qual.fastq -t 3
```

-i = input

-o = output

-t 3 = quality threshold

total 1-100 bp sequences in 24 data files: 653844992

## D Correcting sequencing errors

Program: coral-1.3, split und cat (Standard linux)

Salmela L, Schroeder J. 2011. Correcting errors in short reads by multiple alignments. Bioinformatics 27: 1455-1461. (Also in HiTSeq 2011).

<http://www.cs.helsinki.fi/u/lmsalmel/coral/>

```
uwe@knut:~ split -l 16000000 $in-adapter-qual.fastq 0 -d
```

```
-l 16000000          = number of lines in each piece
```

```
0                  = prefix
```

```
-d                  = numeric suffix default 2
```

```
uwe@knut:~ for k in {000,001,002,003...};do coral -fq $k -o $k-coral.fastq -p 2 -illumina  
            \ -k 21 -e 0.11 -t 0.75 -a 1000;done
```

```
for k ...; do...;done = loop operation
```

```
-fq                = input is fastq format
```

```
-o                 = output
```

```
-p 2               = cpu number for computation
```

```
-illumina          = quick option targets to -mr 1 -mm 1 -g 1000
```

```
-k 21              = k-mer length for indexing
```

```
-e 0.11            = maximum error rate in multiple alignments
```

```
-t 0.75            = minimum proportional read consensus
```

```
-a 1000            = maximum size multiple alignments
```

```
uwe@knut:~ cat 0*-coral.fastq > $in-coral.fastq #merge corrected reads
```

## E Collapsing reads with identical length and 100% identical basepairs Reduction datasize and change to fasta format

Program: fastx-tools\_0.0.13\_binaries\_Linux\_2.6\_amd64

```
uwe@knut:~ fastx_collapser -i $in-coral.fastq -o $in-collapse.fasta
```

## F Collapsing reads with different length and 100% identical base pairs

Program: USEARCH 5.0.144

Robert Edgar

<http://www.drive5.com/usearch/>

```
uwe@knut:~ usearch --sort $in-collapse.fasta --output $in-collapse-sort.fasta -minlen 20
```

```
--sort              = read length sort
```

```
-minlen 20           = minimum read length 20 bp
```

```
uwe@knut:~ usearch -cluster -derep_subseq $in-collapse-sort.fasta -seedsout $in-  
            \ derep.fasta -w 16 -slots 40000003 -sizeout -minlen 20
```

```
-cluster             = cluster identical reads
```

```
-derep_subseq        = independent length
```

```
-seedsout            = save consensus sequence
```

```
-w 16                = alignment word size
```

```
-slots 40000003      = value for indexing (depends on computation power)
```

```
-sizeout             = shows supporting read count in consensus fasta header
```

```
-minlen 20           = minimum read length 20 bp
```

## G Merge all filtered sequences in one data file and rename

Program: fastx-tools\_0.0.13\_binaries\_Linux\_2.6\_amd64

```
uwe@knut:~ cat *derep.fasta > ffr.fasta (ffr = final filtered reads)
```

```
uwe@knut:~ fastx_renamer -i ffr.fasta -o ffr-re.fasta -n COUNT
```

```
-n COUNT             = delete fasta header and replace with increasing numeric values
```

total 20-100bp sequences in 1 datafiles: 75411191

Median read length 92 bp

## H Denovo assembly (RRZN Cluster system) Strand specific multi k-mer assembly

Program: velvet version 1.1.05

Zerbino Dr, Birney E. 2008. Velvet: Algorithms for de novo short read assembly using de Bruijn graphs. Genome Research 18: 821-829.

<http://www.ebi.ac.uk/~zerbino/velvet/>

k-mer size 95-23 in 19 steps with two different

-cov\_cutoff (auto oder 2) settings  
= 38 different k-mer assemblies

bash script job parameter

```
#!/bin/bash
#PBS -N 20120104_1_velvet
#PBS -M uwe.jonas@obst.uni-hannover.de
#PBS -m ae
#PBS -j oe
#PBS -l nodes=1:ppn=8
#PBS -l walltime=100:00:00
#PBS -l mem=150gb
#PBS -q all
# show which computer the job ran on
echo "Job ran on:" $(hostname)
# initialise the modules environment
source $MODULESHOME/init/bash
# load the relevant modules
module load velvet
# change to work dir:
cd $PBS_O_WORKDIR
# the program to run
export OMP_NUM_THREADS=10
#Platzhalter
#$a = numeric k-mer value
#(95,91,87,83,79,75,71,67,63,59,55,51,47,43,39,35,31,27,23)
#$b = auto oder 2
velveth k_$a $a -short -fasta ffr-re.fasta -strand_specific
velvetg k_$a -cov_cutoff $b -min_contig_lgth 200
cat k_$a/contigs.fa > allcontigs.fa
```

## I Removal of polyA stretches, low complexity sequences and adapter remnants

Program: seqclean\_x86\_64  
<http://compbio.dfc.harvard.edu/tgi/software/>  
uwe@knut:~ seqclean allcontigs.fa -v Adapter-Pix2.fa

Assembled contigs from Velvet: 789910

|     |    |                                                                                                                                                                                                                                                     |
|-----|----|-----------------------------------------------------------------------------------------------------------------------------------------------------------------------------------------------------------------------------------------------------|
| Add | 22 | published Prunus avium sequences from<br>Alkio M, Jonas U, Sprink T, Van Nocker S, Knoche M. 2012 Identification of putative<br>candidate genes involved in cuticle formation in Prunus avium (sweet cherry) fruit<br>Annals of Botany 110: 101-112 |
|     | 3  | unpublished Prunus avium sequences from Version 1.3 and                                                                                                                                                                                             |
|     | 1  | Enterobacteria phage phiX174 complete genome                                                                                                                                                                                                        |

Programm: renameESTs.pl (perl script aus PAVE 3.0)  
uwe@knut:~ renameESTs.pl allcontigs.clean.fasta raw6.fasta  
raw6\_000001 - raw6\_789936  
Number of Contigs for PAVE super assembly: 789936

Digested statistics

Program:fasta\_summary.pl (perl script Konrad Paszkiewicz)  
uwe@knut:~ fasta\_summary.pl -i raw6.fasta -o raw6.stat

Statistics for read lengths:

|                                    |        |
|------------------------------------|--------|
| Min read length:                   | 107    |
| Max read length:                   | 7609   |
| Mean read length:                  | 480.94 |
| Standard deviation of read length: | 376.04 |
| Median read length:                | 351    |
| N50 read length:                   | 549    |

Statistics for numbers of reads:

Number of reads: 789936  
 Number of reads >=1kb: 61920  
 Number of reads in N50: 197544

Statistics for bases in the reads:  
 Number of bases in all reads: 379908465  
 Number of bases in reads >=1kb: 92311426  
 GC Content of reads: 43.26 %

Simple dinucleotide repeats:  
 Number of reads with over 70% dinucleotide repeats: 0.00 % (0 reads)  
 AT: 0.00 % (0 reads)  
 CG: 0.00 % (0 reads)  
 AC: 0.00 % (0 reads)  
 TG: 0.00 % (0 reads)  
 AG: 0.00 % (0 reads)  
 TC: 0.00 % (0 reads)

Simple mononucleotide repeats:  
 Number of reads with over 50% mononucleotide repeats: 0.00 % (0 reads)  
 AA: 0.00 % (0 reads)  
 TT: 0.00 % (0 reads)  
 CC: 0.00 % (0 reads)  
 GG: 0.00 % (0 reads)

**J Superassembly of assembled Velvet contigs (raw6\_000001 - raw6\_789936)**

Programme: PAVE 3.0, CAP3 and working MySQL-Server

uwe@knut:~ loadLibrary.pl Pa\_assembly  
 Configuration file LIB.cfg

PAVE\_db = PAVE\_Pa\_assembly # Database name  
 PAVE\_host = IP # Database host IP  
 PAVE\_user = # MySQL read/write user  
 PAVE\_password = # MySQL password

libid = raw6  
 seqfile = raw6.fasta  
 title = raw6 contigs Library  
 organism = Prunus avium  
 cultivar = Regina  
 tissue = Ovary Exocarp Mesocarp  
 stage = 03 - 94 DAFB weekly sampling  
 source = RNA-HiSeq\_2010 Velvet raw contigs  
 default\_qual = 21

uwe@knut:~ runPAVE.pl Pa\_assembly  
 Configuration file PAVE.cfg

AssemblyID = Pa # Assembly name  
 # Database parameters (same as in LIB.cfg)  
 PAVE\_db = PAVE\_Pa\_assembly # Database name  
 PAVE\_host = IP # Database host IP  
 PAVE\_user = # MySQL read/write user  
 PAVE\_password = # MySQL password  
  
 CPUs = 4 # number of processors to use for assembly  
 SKIP\_ASSEMBLY = 0  
 USE\_TRANS\_NAME = 0  
 CLIQUE = 400 99 20 #400 overlap 99 identity% 20 unfit overlap  
 TC1 = 300 99 20 #decreasing stringent conditions  
 TC2 = 200 98 20

TC3 = 150 98 20  
TC4 = 100 97 40

EXTRA\_CONFIRM = 10  
SNP\_CONFIRM = 10  
INDEL\_CONFIRM = 5

Number of contigs from PAVE Assembly: 68101

Digested statistics

Program:fasta\_summary.pl (perl script Konrad Paszkiewicz)  
uwe@knut:~ fasta\_summary.pl -i Pa\_ctg\_sng.fasta -o Pa\_ctg\_sng.stat

Statistics for contig lengths:

Min contig length: 107  
Max contig length: 14149  
Mean contig length: 660.80  
Standard deviation of contig length: 700.45  
Median contig length: 370  
N50 contig length: 1070

Statistics for numbers of contigs:

Number of contigs: 68101  
Number of contigs >=1kb: 12867  
Number of contigs in N50: 11874

Statistics for bases in the contigs:

Number of bases in all contigs: 45000984  
Number of bases in contigs >=1kb: 23528097  
GC Content of contigs: 42.31 %

Simple dinucleotide repeats:

Number of contigs with over 70% dinucleotide repeats: 0.00 % (0 contigs)

AT: 0.00 % (0 contigs)  
CG: 0.00 % (0 contigs)  
AC: 0.00 % (0 contigs)  
TG: 0.00 % (0 contigs)  
AG: 0.00 % (0 contigs)  
TC: 0.00 % (0 contigs)

Simple mononucleotide repeats:

Number of contigs with over 50% mononucleotide repeats: 0.00 % (0 contigs)

AA: 0.00 % (0 contigs)  
TT: 0.00 % (0 contigs)  
CC: 0.00 % (0 contigs)  
GG: 0.00 % (0 contigs)

## K Read re-mapping to contigs (68101), fpkm calculation

Programs: bowtie, tablet, LibreOffice

bowtie 0.12.7 <http://bowtie-bio.sourceforge.net/index.shtml>

tablet 1.12.03.26 <http://bioinf.scri.ac.uk/tablet>

libreoffice 3.5 calc <http://de.libreoffice.org>

uwe@knut:~ bowtie-build Pa\_ctg\_sng.fasta  
build reference index

uwe@knut:~ bowtie -v 1 -M 2 --trim5 5 --trim3 30 -best -strata Pa\_ctg\_sng.fasta -q \$in -S  
\$in.sam

\$in fastq samples 03G-80M unfiltered, untrimmed  
-v 1 allowed mismatch 1  
-M 2 random reports of multiple matching reads  
--trim5 5 trim 5 bases at 5' end

|            |                                             |
|------------|---------------------------------------------|
| --trim3 30 | trim 30 bases at 3`end                      |
| -best      | hits guaranteed best stratum                |
| -strata    | hits in sub-optimal strata are not reported |
| \$in.sam   | reported hits in SAM format                 |

Opening \$in.sam in tablet after visual inspection, copy and paste read count/contig to LibreOffice calc. Calculate total read count and fpkm values.

Filter settings for high and low abundance contigs

|                                |                                                    |
|--------------------------------|----------------------------------------------------|
| Group 1 high abundance contigs | ≥ 200 bp length                                    |
|                                | ≥ 30 total read count per contig in each sample    |
|                                | ≥ 75 total read count per contig in all 24 samples |
| Group 2 low abundance contigs  | < 200 bp length                                    |
|                                | < 30 total read count per contig in each sample    |
|                                | < 75 total read count per contig in all 24 samples |
