# Supplementary figures and images for: Transcriptional dynamics of the developing sweet cherry (Prunus avium L.) fruit: sequencing, annotation and expression profiling of exocarp-associated genes
Source: PubMed Central journal article supplement — Hortic Res. 2014 Mar 12;1:11–. doi: 10.1038/hortres.2014.11 (PMC4591669; doi:10.1038/hortres.2014.11), 2014-03-12

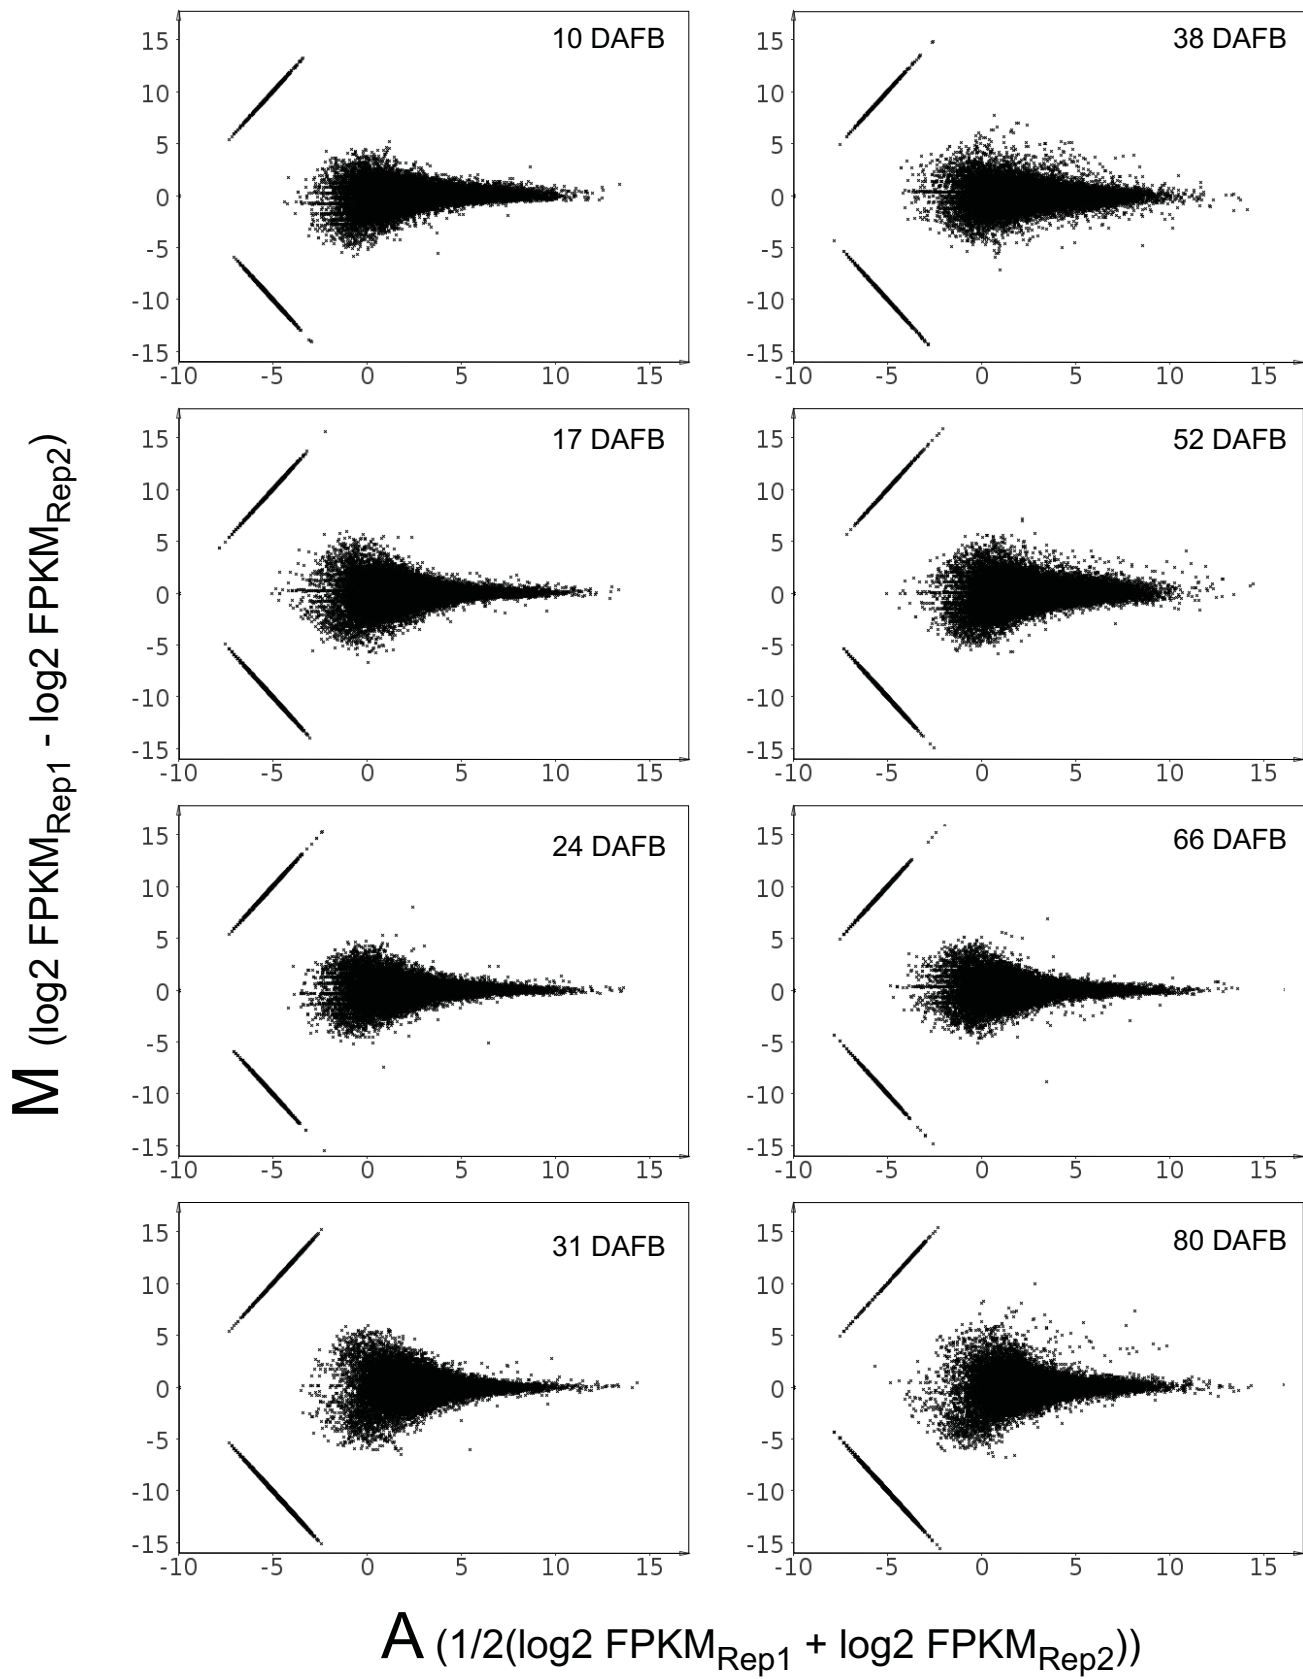

Supplement: hortres201411-s10.pdf [file hortres201411-s10.pdf]

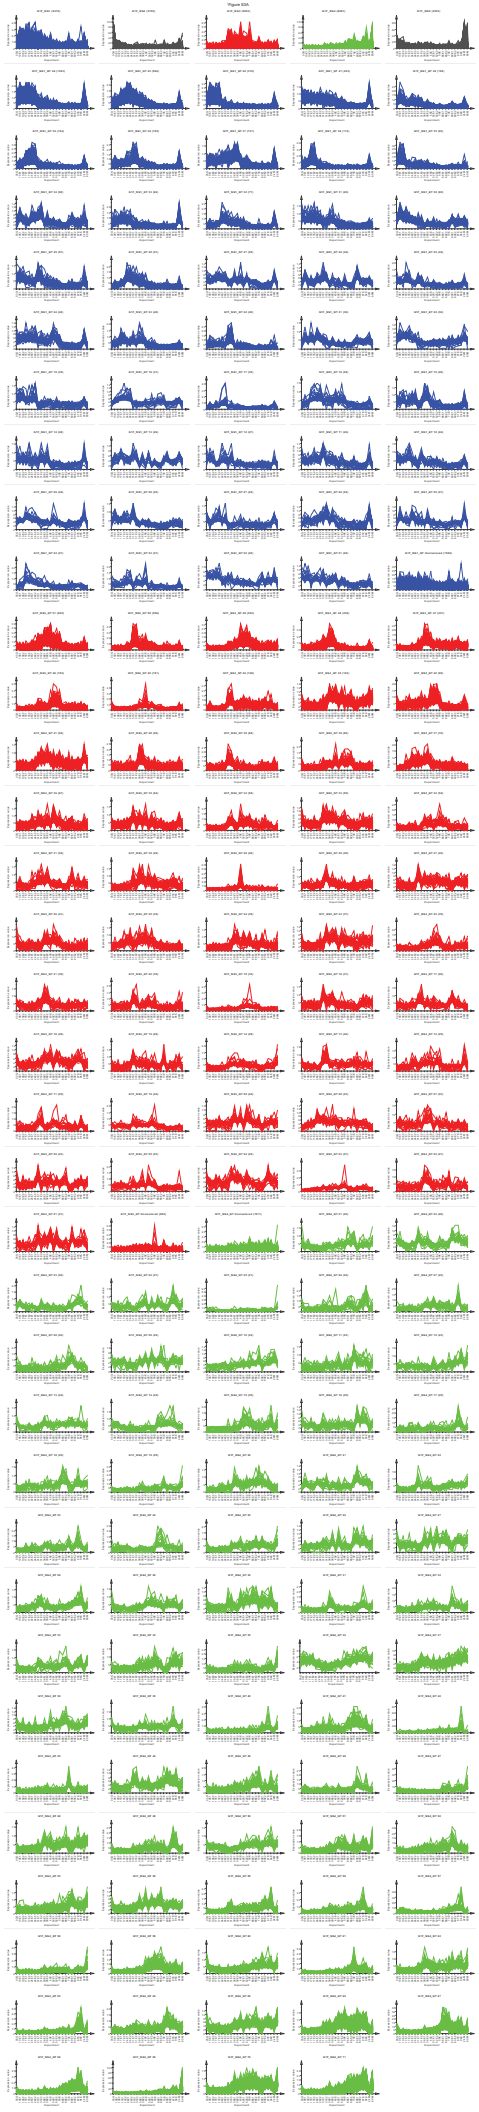

Figure S3B

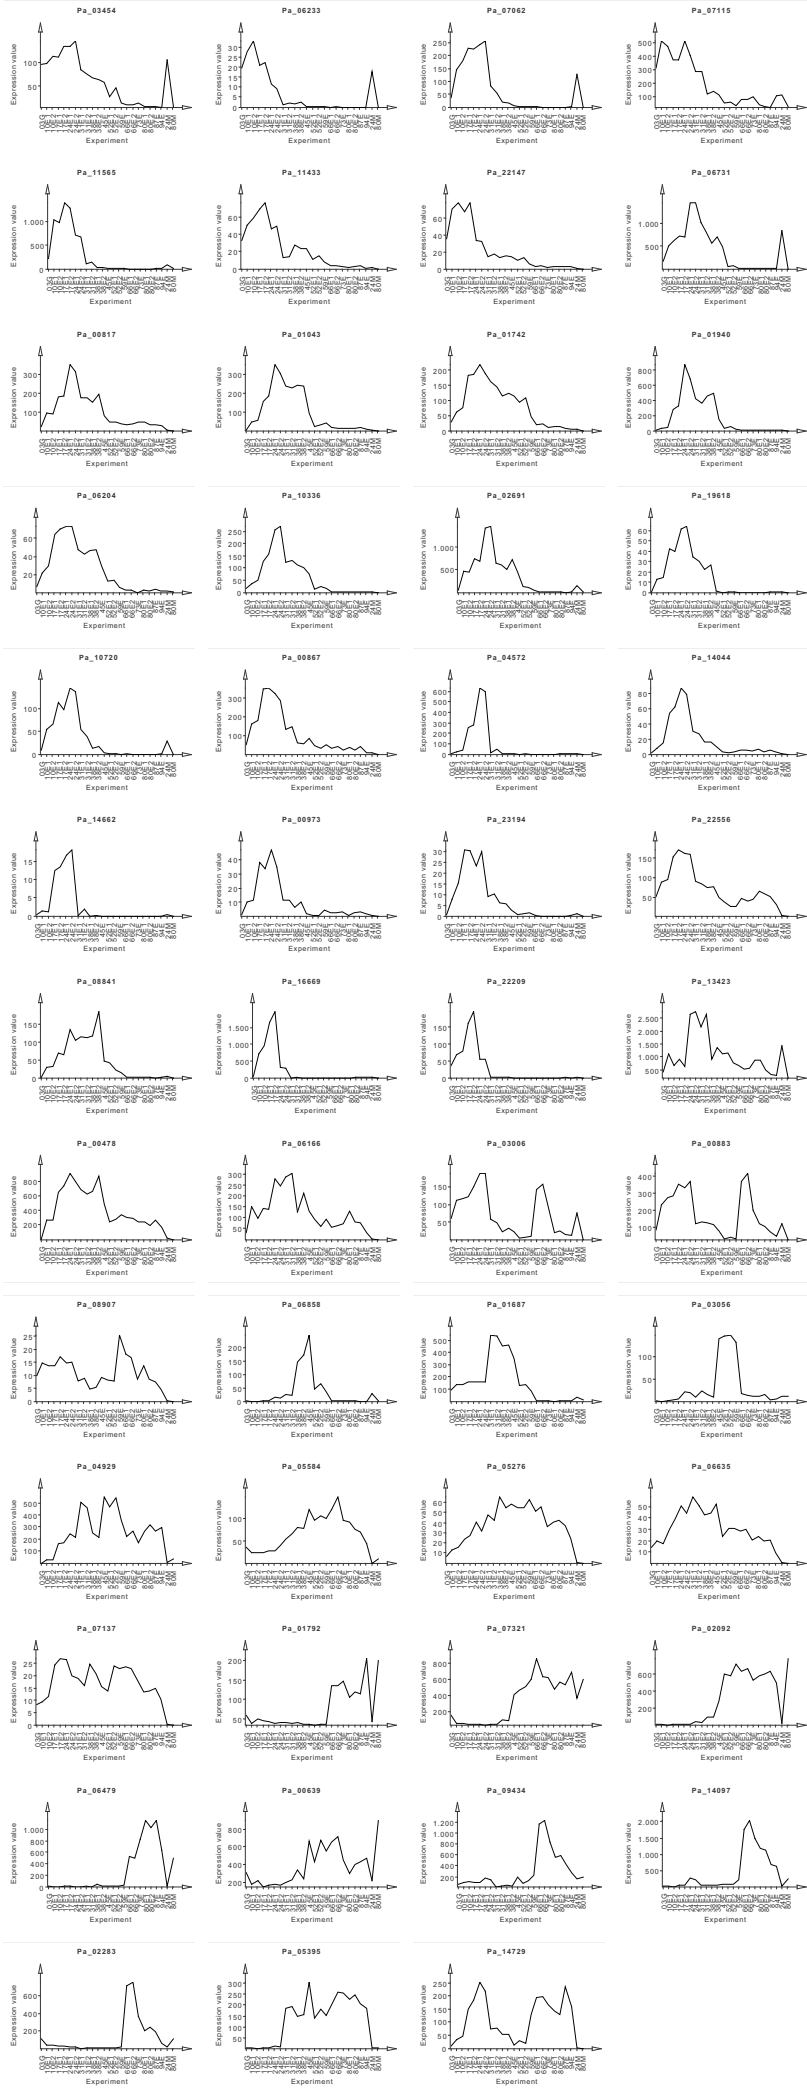

Supplement: hortres201411-s11.pdf [file hortres201411-s11.pdf]
